# Supplementary material for: Natural variation in genome architecture among 205 Drosophila melanogaster Genetic Reference Panel lines
Source: HighWire-hosted journal article supplement (doi:10.1101/gr.171546.113), 2014-04-08
Supplement: Supplemental_Text_S1-S2_and_Methods.docx [file Supplemental_Text_S1-S2_and_Methods.docx]

**Supplemental Text S1: Detailed GWA Analysis Results**

**Starvation stress resistance**

At a nominal significance threshold of *P* < 10-5, 39 variants in or near 27 genes were associated with starvation resistance in females, and 20 variants in or near 17 genes were associated with starvation resistance in males (Supplemental data file S12). Four variants (in *genghis khan* (*gek*), *something that sticks like glue* (*snama*), *cap-n-collar* (*cnc*) and *CG9928*) were associated with starvation resistance in both sexes. A synonymous SNP in *gek* (2R_19982478) achieved Bonferroni-level significance in females. The effects of the variants, estimated as one-half the difference in mean between the major and minor allele classes (Falconer and Mackay, 1996), were predominantly negative: less frequent alleles live longer under starvation stress than the common alleles. To the extent that frequency is a proxy for fitness, this suggests a cost to increasing starvation resistance. Gene-based GWA identified 12 genes associated with starvation resistance in females and three in males at a nominal significance threshold of *P* < 10-5 (Supplemental data file S13). Four of these genes (*gek*, *fuzzy onions* (*fzo*), *homeodomain interacting protein kinase* (*hipk*) and *CG17180*) were also implicated by single variant association tests in females, highlighting the complementary nature of single variant and gene-based tests. Seven of the genes were nominally significant (*P* < 10-4) in tests using rare (MAF < 0.05) variants, and could never be implicated by targeting only the common end of the allele frequency spectrum.

The Freeze 1.0 DGRP paper (Mackay *et al*., 2012) also reported a GWA analysis of starvation stress resistance. Comparison of the Freeze 1.0 and Freeze 2.0 analyses reveals many more genes nominally (*P* < 10-5) associated with this trait in the Freeze 1.0 analysis. The reason for this discrepancy is because we assessed all variants with minor allele counts of 4 or more in the Freeze 1.0 GWAS and with minor allele counts of 10 or more in the Freeze 2.0 GWA analysis. Since the allele frequency spectrum is highly skewed towards rare alleles, there were thus many more tests run in the Freeze 1.0 analyses. However, the LD analysis in this manuscript made it clear that long range LD was considerable for variants present in fewer than 10 lines; in particular, variants present in only 4 lines have, on average, a hundred or more genome wide variants in high LD. This means that there are likely true causal variants at low frequency, but one cannot tell which one(s) are causal. Although we find many fewer associated variants when we impose the threshold of the rare allele being present in at least 10 lines, they are more likely to be casual.

For common variants (> 10 minor allele counts) that were significant in Freeze 1.0, the overlap between the two analyses is very good (20 out of 22 variants for males and 39 out of 43 for females). The remaining common variants that were significant in Freeze 1.0 had relatively small *P*-values in the Freeze 2.0 analysis (in the range of 1.06e-5 to 3.74e-4), but did not meet the reporting threshold. There are other possible reasons for the lack of overlap and change in the magnitude of association between the two analyses. Alleles may have been present in only three lines in Freeze 1.0 but 10 lines in Freeze 2.0, and hence assessed in Freeze 2.0 but not Freeze 1.0. Freeze 2.0 queried the effects of indels, which was not done in Freeze 1.0. SNPs may have been inaccurately called if they are near indels. We noted in the manuscript that female starvation resistance is associated with *In(3R)K*; variants in LD with this inversion were excluded in Freeze 2.0 but were included in the Freeze 1.0 analysis, which did not adjust for the effects of inversion. Finally, we have shown previously (Huang *et al*., 2012) that there are strong epistatic interactions for starvation resistance, such that common SNPs have different effects depending on the genetic background. The genetic background of the Freeze 2.0 DGRP includes many more lines than the Freeze 1.0 DGRP, and hence epistasis is another possible reason for different effect sizes of common alleles present in both studies.

***Wolbachia* infection status**

Two highly significant single variant associations were from the erroneous genotype calls of two *Wolbachia* insertions in all lines infected with *Wolbachia*. The remaining 26 single variants significant at *P* < 10-5 were located in or near 30 genes (Supplemental data file S12). Gene based tests identified 21 genes significant at the *P* < 10-4 nominal threshold, of which four (*saxophone* (*sax*), *Nop17 like* (*Nop17l*), *CG32061* and *CG33702*) overlapped with the single variant test results (Supplemental data file S13). We found no significant enrichment of gene ontology categories for the 47 genes implicated in both analyses. However, we note that *sax* is an interesting candidate gene. It functions in the biological processes of oogenesis, consistent with the maternal transmission of the endosymbiont, as well in the regulation of innate immune response, particularly the response to gram negative bacteria such as *Wolbachia* (McQuilton *et al*., 2012).

**Genome size**

We found 90 single variants in or near 55 genes at *P* < 10-5, seven of which had *P*-values < 10-7 (for a false discovery rate of FDR = 0.027) (Supplemental data file S12). The top variants were located in or near *CG32521*, *pointed* (*pnt*), *eyes absent* (*eya*), *myotubularin* (*mtm*), *CG7650*, and *Rho GTPase activating protein at 71E* (*RhoGAP71E*). Three variants (X_21136189_SNP in *CG32521*, 3L_5383897_SNP (intergenic) and 3R_19140810_DEL in *pnt*) achieved Bonferroni level significance. We identified 57 genes using the gene-based methods at *P* < 10-4 (FDR = 0.026); tests for 12 genes (*CG12659*, *lethal(2)35Bc* (*l(2)35Bc*), *CG12057*, *Negative Cofactor 2ß* (*NC2ß*), *CG6294*, *CG6299*, *CG4768*, *CG12056*, *CG3638*, *mtm*, *CG12118* and *CG12106*) achieved Bonferroni level significance (Supplemental data file S13). Seven genes (*eya*, *mutagen-sensitive 312* (*mus312*), *mtm*, *CG13996*, *CG8602*, *CG32521* and *CG42307*) overlapped between the two methods. We found no significant enrichment of gene ontology categories for the 105 genes implicated in both analyses. The majority of the top genes implicated by the GWA analyses were in computationally predicted genes with no functional annotations, and many of the annotated genes have described functions in processes or pathways not obviously associated with genome size. Two of the top candidate genes do, however, have plausible associations with processes that could lead to variation in genome size. *mus312* is involved in meiotic chromosome segregation and DNA replication, and *mtm* is involved in chromosome segregation and the mitotic cell cycle (McQuilton *et al*., 2012).

**Supplemental Text S2: Methods**

# Library construction and sequencing

# 5ug genomic DNA in 100ul volume was sheared into fragments of approximately 300 base pairs with the Covaris S2 or E210 system (Covaris, Inc. Woburn, MA). The setting was 10% Duty cycle, Intensity of 4,200 Cycles per Burst, for 120 seconds. Fragments were processed through DNA End-Repair in 100ul containing sheared DNA, 10ul 10X buffer, 5ul End­Repair Enzyme Mix and H2O (NEBNext End-Repair Module; Cat. No. E6050L) at 20°C for 30 minutes; A-tailing was performed in 50ul containing End-Repaired DNA, 5ul 10X buffer, 3ul Klenow Fragment (NEBNext dA-Tailing Module; Cat. No. E6053L) at 37°C for 30 minutes, each step followed by purification using a QIAquick PCR purification kit (Cat. No. 28106). Resulting fragments were ligated with Illumina multiplexing PE adapters and the NEBNext Quick Ligation Module (Cat. No. E6056L). After ligation, size selection was carried out by using 2% low-melt agarose gel running in 1X TBE. Gel slices were excised from 290bp to 320bp and the size-selected DNA was purified using a Qiagen MinElute gel extraction kit and eluted in 30ul EB buffer. PCR with Illumina PE 1.0 and 2.0 primers was performed in 25-μl reactions containing 12.5 ul of 2x Phusion High-Fidelity PCR master mix, 2.5ul size-selected fragment DNA, 0.3ul each primer and H2O. The standard thermocycling for PCR was 30 s at 98°C for the initial denaturation followed by 10 cycles of 10 s at 98°C, 30 s at 65°C and 30 s at 72°C and a final extension of 5 min. at 72°C. Agencourt® XP® Beads (Beckman Coulter Genomics, Inc.; Cat. No. A63882) were used to purify the PCR products. After Bead purification, PCR products were quantified using PicoGreen (Cat. No. P7589) and their size distribution analyzed using the Agilent Bioanalyzer 2100 DNA Chip 7500 (Cat. No. 5067-1506). 10nM 15ul of final library was passed for sequencing on the Illumina HiSeq 2000 or GAII platforms, according to the manufacturer’s specifications. Sequencing libraries were quantified with an Agilent 2100 Bioanalyzer. Cluster generations were performed on an Illumina cluster station. Up to 100 cycles of sequencing were carried out (depending on the sample, some samples were sequenced to 125bp read lengths on the GAII – see Supplemental data file S1 for the read lengths and numbers for each sample) with up to 5 libraries barcoded per HiSeq flow cell lane.

**Integrated genotyping**

We used an integrated genotyping algorithm to update the variant calls for each line in turn by determining whether variants found in one or more other lines were also in the genome of the focal line, but were not called initially in that line due to low coverage. To initiate integrated genotyping in both stages, we grouped the haplotypes from the global list of non-SNP variants into bins flanked by regions of at least 110 bp without any non-SNP variants in any line (*i.e.*, SNPs and di-nucleotide substitutions are ignored in this step). 110 bp flanking regions were chosen due to the ~100 bp read length. We included both flanking regions of each bin in the bin haplotype sequences, so that reads partially covering the variants could fully align with one of more alternative haplotypes of the bin. Next, we derived the sequence of each distinct haplotype of each bin plus its flanking region (including the reference genome haplotype). The (mostly) paired end reads for the focal line were first aligned to the reference genome and then to the collection of haplotypes. Alignment did not allow gaps, but did allow mismatches. Read pairs that aligned to more than one site of the reference genome were discarded to avoid variant-calling artifacts in duplicated regions. We then filtered the resulting alignments such that (i) read pair reads were mapped within the insert size of the library, allowing for deletions; and (ii) that all alignments for the same read that successfully mapped to the reference and/or haplotype(s) were to the same bin. We established the mapping coordinates for each haplotype and counted the number of mismatches of each alignment for the read. Any non-SNP variant belonging to the haplotype(s) with the lowest number of mismatches and overlapping with the read was given a supporting vote while other non-SNP variants overlapping with the read were given an opposing vote. Next, we checked each read for SNP or di-nucleotide variants with the winning haplotype(s) in order to count supporting and opposing votes for SNPs. Any variant only received one vote (supporting or opposing) from a single read, even if the same variant was part of more than one haplotype with the lowest number of mismatches. Finally, the genotyping algorithm gave the number of supporting and opposing votes for each variant from the original global list. A separate program was then invoked to assign initial genotypes based on supporting and opposing reads for each variant. At this stage of the analysis, a variant was naively called homozygous if at least two reads supported it and no read opposed it, or at least four reads supported it and up to one read opposed it, or 90% or more of all reads aligned supported it. If not called homozygous, a variant was called segregating if two or three reads supported it and one opposed it or if 10% or more (but at least two) of all reads aligned supported it. To reduce the possibility of artifacts due to duplications, we removed variants that were called segregating in at least 20 lines but with no homozygous calls in any line.

**Validation**

#### We used genomic hybridization to Affymetrix GeneChip Drosophila 1.0R tiling arrays to validate deletions >25bp in six DGRP lines. We mapped the probe annotation to the current reference genome, determined the raw intensity for each probe, and normalized the intensities of each sample array by the median intensity. We evaluated all deletions in the six lines that were fully overlapped by at least one oligonucleotide probe position by computing the median log2 intensity ratio between the sample and the reference for all probes encompassed by the deletion. We excluded deletions if the median probe intensity on the reference array was among the upper or lower 0.05-quantile of all reference array probe intensities. We estimated the False Discovery Rate (FDR) by comparing the log2 intensity ratios for each variant between samples in which a deletion variant was called and samples in which the non-deleted allele was called. We computed the median log2 intensity ratio distribution of negative calls and used the 0.05-quantile as a cutoff for assuming ‘verification’ of the deletion. We inferred the 0.05-quantile based on the opposite right tail of the distribution. We estimated the FDR as the fraction of deletions not reaching the aforementioned cutoff.

We used 454 sequence data from 38 DGRP lines to validate SNP and non-SNP calls. We split the 454 reads at homopolymers ≥ 5 bp; thus, homopolymer indels could not be validated. We required variants to be validated to be covered by a minimum of four 454 and eight Illumina reads. We used the integrated genotyping algorithm described above to count supporting and opposing reads of alleles for variants, with two modifications. First, the flanking sequence bins were 300 bp to account for the longer 454 reads. Second, the algorithm drew the list of variants from the final calls from the Illumina genotyping analysis compared to no variants. We tested the allele counts from Illumina and 454 for concordance using a Fisher Exact Test. We used a nominal 5% significance threshold to declare discordance, giving a conservative estimate of the number of concordant genotype calls.

***Wolbachia* status**

To determine *Wolbachia* infection status of the DGRP lines we used the primers wsp81F (5’-tgg tcc aat aag tga tga aag aac-3’) and wsp691R (5’-aaa aat taa acg cta ctc ca-3’) to amplify a portion of the *Wolbachia wsp* gene. The PCR consisted of 35 cycles of 94°C for 15 seconds, 55°C for 30 seconds and 72°C for 60 seconds. We used DGRP_101 and DGRP_105 as negative controls and DGRP_142 and DGRP_149 as positive controls. We also genotyped all DGRP lines for insertions of *Wolbachia* genome at *2R*:16,594,660 and *2R*:19,117,791. All PCR conditions were as described above for the *wsp* primer set. For each insertion, we performed two PCR reactions using the combination of P1 + P3, and P1 + P2 (Fig. 3). P1 + P3 hybridize to flanking sequences of the insertion site, and therefore the presence and absence of *Wolbachia* insertion produce different sized amplicons. P2 hybridizes with the inserted *Wolbachia* sequence, and therefore P1 + P2 only amplify when the insertion is present. For the *2R*:16,594,660 insertion, the primer sequences are 5’-atg acc tag gcg aac gat tg-3’ for P1, 5’-cgc ttg caa gag gta cac tg-3’ for P2, and 5’-tgg cct gct gaa gct aaa at-3’ for P3. For the *2R*:19,117,791 insertion, the primer sequences are 5’-gcc ccg aag aca cat tag aa-3’ for P1, 5’-tcc ttc gat aat ttt tgc ctt t-3’ for P2, and 5’-act gga aca atg cca agt cc-3’. PCRs were performed by 35 cycles of 94°C for 15 seconds, 55°C for 30 seconds and 72°C for 60 seconds.

**Population genomics**

We followed a strict protocol to polarize indel alleles. (i) For each biallelic indel, we added 100 nucleotides 5’ and 3’ from the reference sequence. (ii) We blasted both allelic sequences to *D. simulans*, retaining the longest *D. simulans* sequence from both blast results for the next step. We discarded blast results with multiple hits and required that a valid hit must include at least 80% of the added nucleotides in step (i). Because larger indels do not always result in a valid blast alignment, we required valid blast hits for both alleles for indels ≤ 25 bp, while for indels > 25 bp only one valid hit for any of the two alleles was considered sufficient. (iii) We simultaneously aligned both indel allele sequences plus the corresponding *D. simulans* sequence using MAFFT software (Katoh and Standley, 2013) using the '--globalpair --maxiterate 20' options. This gave comparable results compared with other alignment software such as ClustalOmega (Sievers *et al*., 2011), TCoffe (Notredame *et al*., 2000) and MUSCLE (Edgar, 2004). (iv) We trimmed the alignment at 25 bp before and after the indel initial and end coordinates, respectively. We assigned derived allele status to the allele sequence which differs from the *D. simulans* sequence in this alignment region. From the trimmed alignment we discarded any fixed indels between *D. simulans* and *D. melanogaster*, or any partially overlapping gap. (v) We determined insertion or deletion status based on whether the derived allele sequence adds or removes nucleotides compared with *D. simulans.*
